# Supplementary material for: The Influence of Synaptic Weight Distribution on Neuronal Population Dynamics
Source: PubMed Central journal article supplement (PMC3808453; doi:10.1371/journal.pcbi.1003248), 2013-10-24
Supplement: pcbi.1003248.s015.pdf [file pcbi.1003248.s015.pdf]

| dt (ms) \ N | 10,000 | 20,000 | 50,000 | 100,000 | DiPDE (nmz)  |
|-------------|--------|--------|--------|---------|--------------|
| 0.1         | 8.4    | 17.1   | 42.7   | 82.8    | 7.5 (42,707) |
| 0.5         | 2.8    | 5.6    | 13.9   | 28.8    | 0.5 (5,656)  |
| 1.0         | 2.1    | 4.3    | 10.8   | 21.8    | 0.2 (1,782)  |
