# Supplementary material for: The Influence of Synaptic Weight Distribution on Neuronal Population Dynamics
Source: PubMed Central journal article supplement (PMC3808453; doi:10.1371/journal.pcbi.1003248), 2013-10-24
Supplement: pcbi.1003248.s016.pdf [file pcbi.1003248.s016.pdf]

| Distributions | Delta | Gaussian | Exponential | Lognormal | Bimodal | Power law |
|---------------|-------|----------|-------------|-----------|---------|-----------|
| Delta         | Inf   | 1,853    | 553         | 395       | 23      | 37        |
| Gaussian      | 1,291 | Inf      | 2,632       | 1,350     | 27      | 44        |
| Exponential   | 385   | 1,833    | Inf         | 16,550    | 31      | 53        |
| Lognormal     | 276   | 940      | 11,523      | Inf       | 32      | 55        |
| Bimodal       | 16    | 19       | 22          | 23        | Inf     | 535       |
| Power law     | 26    | 31       | 37          | 39        | 373     | Inf       |
