# Supplementary material for: The Influence of Synaptic Weight Distribution on Neuronal Population Dynamics
Source: PubMed Central journal article supplement (PMC3808453; doi:10.1371/journal.pcbi.1003248), 2013-10-24
Supplement: pcbi.1003248.s017.pdf [file pcbi.1003248.s017.pdf]

| Distributions | Delta  | Gaussian | Exponential | Lognormal | Bimodal | Power law |
|---------------|--------|----------|-------------|-----------|---------|-----------|
| Delta         | Inf    | 48,850   | 31,326      | 6,730     | 85      | 44        |
| Gaussian      | 34,012 | Inf      | 60,638      | 7,715     | 80      | 42        |
| Exponential   | 21,749 | 42,219   | Inf         | 17,409    | 83      | 43        |
| Lognormal     | 4,686  | 5,372    | 12,121      | Inf       | 93      | 46        |
| Bimodal       | 59     | 56       | 58          | 65        | Inf     | 526       |
| Power law     | 31     | 29       | 30          | 32        | 367     | Inf       |
