# Supplementary material for: The Influence of Synaptic Weight Distribution on Neuronal Population Dynamics
Source: PubMed Central journal article supplement (PMC3808453; doi:10.1371/journal.pcbi.1003248), 2013-10-24
Supplement: pcbi.1003248.s018.pdf [file pcbi.1003248.s018.pdf]

| Distribution | Lower $f_l$ (Hz) | Upper $f_u$ (Hz) | Dyn. Range ( $f_u/f_l$ ) |
|--------------|------------------|------------------|--------------------------|
| delta        | 1,639.4          | 16,761           | 10.22                    |
| Gaussian     | 1,393.9          | 16,602           | 11.91                    |
| exponential  | 1,194.2          | 16,000           | 13.40                    |
| lognormal    | 1,054.5          | 16,000           | 15.17                    |
| bimodal      | 432.6            | 13,768           | 31.83                    |
| power law    | 405.0            | 12,823           | 31.66                    |
