# Supplementary material for: The Influence of Synaptic Weight Distribution on Neuronal Population Dynamics
Source: PubMed Central journal article supplement (PMC3808453; doi:10.1371/journal.pcbi.1003248), 2013-10-24
Supplement: pcbi.1003248.s019.pdf [file pcbi.1003248.s019.pdf]

| Distribution | Max rel. exc (without syn dep) | Max rel. exc (with syn dep) |
|--------------|--------------------------------|-----------------------------|
| delta        | 2.95                           | 1.97                        |
| Gaussian     | 3.00                           | 1.68                        |
| exponential  | 2.92                           | 1.52                        |
| lognormal    | 2.88                           | 1.45                        |
| bimodal      | 1.32                           | 1.07                        |
| power law    | 1.76                           | 1.08                        |
