# Supplementary material for: The Influence of Synaptic Weight Distribution on Neuronal Population Dynamics
Source: PubMed Central journal article supplement (PMC3808453; doi:10.1371/journal.pcbi.1003248), 2013-10-24
Supplement: pcbi.1003248.s022.pdf [file pcbi.1003248.s022.pdf]

## Text S3

### S3 Computational complexity with DiPDE

For a given time step  $dt$  and number  $N$  of LIF neurons to be simulated, the computational cost involved with a NEST simulation for a feed-forward network is  $O(N/dt)$ . The  $1/dt$  dependence follows from the fact that the number of time steps involved in the simulation  $N_t \sim 1/dt$ . In our DiPDE simulations, there is no reference to a fixed number of neurons in the population; we solve for the probability distribution  $p(v, t)$  for the neuronal membrane potential to be at some  $v$  between 0 and  $\theta$  at time  $t$ . The computational cost for a DiPDE simulation with time step  $dt$  is dominated by the synaptic input step. As outlined in (Methods: Numerical Solutions), this step involves multiplying a  $(N_v \times 2N_v)$  transition matrix  $T$  with a  $(N_v \times 1)$  vector of the probability distribution  $p(v, t_k)$  for the membrane potential at time  $t_k$ . As in equation (15),  $N_v = -\frac{\tau_m}{dt} \ln(1 - e^{-dt/\tau_m})$  is the number of voltage bin-edges generated with our geometric binning scheme. Thus, the computational cost for a DiPDE simulation of a feed-forward network with external input rate  $f$  determined by a homogeneous Poisson process scales asymptotically as  $O(N_v^2/dt)$ . For a  $\delta$ -function or bimodal distribution of synaptic weights, the transition matrix  $T$  is sparse. In such cases, the computational cost scales asymptotically as  $O(nnz/dt)$  where  $nnz \sim N_v$  is the number of non-zero elements in the sparse transition matrix  $T$ .

Table (S1) shows the total simulation times using NEST (with different numbers of neurons  $N$ ) and DiPDE for different choices of time step  $dt$ , for the feed-forward network of Fig. (1). Note that the transition matrix  $T$  in this case is a  $N_v \times 2N_v$  sparse matrix which keeps track of the effect of super-threshold synaptic inputs. Ignoring the effect of the excess synaptic input and re-setting the membrane potential to zero would lead to a  $N_v \times N_v$  sparse matrix.

With an unconditionally stable numerical scheme to solve the Fokker-Planck equation, the computational cost involved would scale asymptotically as  $O(N'_v/dt')$ , where  $N'_v$  is the number of uniform bins used to discretize the voltage between 0 and  $\theta$  and  $dt'$  is the time step used.
